# Supplementary material for: Failure to learn a new spatial format in children with developmental dyslexia
Source: PubMed Central journal article supplement — Sci Rep. 2014 May 2;4:4869. doi: 10.1038/srep04869 (PMC4007079; doi:10.1038/srep04869), 2014-05-02

## **Failure to learn a new format in children with developmental dyslexia**

Maria Pontillo<sup>1,2</sup>, Maria De Luca<sup>1</sup>, Andrew W. Ellis<sup>3</sup>, Chiara Valeria Marinelli<sup>1</sup>, Donatella Spinelli<sup>1,4</sup>, and Pierluigi Zoccolotti<sup>1,2\*</sup>

<sup>1</sup> *Neuropsychology Unit, IRCCS Fondazione Santa Lucia, via Ardeatina 306, 00179 Rome, Italy*

<sup>2</sup> *Psychology Department, Sapienza University of Rome, via dei Marsi, 78, 00185 Rome, Italy*

<sup>3</sup> *Department of Psychology, University of York, York, YO10 5DD, United Kingdom*

<sup>4</sup> *Department of Human Movement, Social and Health Sciences, University of Rome "Foro Italico", piazza Lauro De Bosis 15, 00135 Rome, Italy*

\*Corresponding Author:

Pierluigi Zoccolotti

Department of Psychology

Sapienza University of Rome

Via dei Marsi 78, 00176 Rome, Italy

[pierluigi.zoccolotti@uniroma1.it](mailto:pierluigi.zoccolotti@uniroma1.it)

## **Supplementary information**

Lists of novel words. The items are listed in alphabetical order; however, in the experiment they were displayed in a random order.

List A (zigzag novel words used at pre-training, training, and post-training):

acato, apate, barta, begia, bicra, cirbo, citro, creto, cuato, cubra, darro, dicca, edofa, erive, fergo, fieso, fonna, fripe, galfe, garto, gimio, gualo, larso, legro, lupre, lurge, miane, mirce, muppa, nupra, odefa, paffo, parpa, pitto, prota, pucca, rigna, rista, scano, sinno, suofi, taddo, tolle, traco, trole, vepra, vesci, virto, zaffo, zudda.

List B (untrained zigzag novel words used at post-training to evaluate the transfer of learning):

acria, asqua, balfa, berro, burba, carfo, cerno, cirto, clame, cospa, dirte, drugi, eleca, etela, fesia, fiema, fiusa, frede, ganna, garva, giafa, gursa, lapro, ledde, lerta, lurro, maffo, marno, molfa, nerna, otare, plena, pelte, piona, pitro, prula, rallo, ricco, scido, sirno, suala, tecco, telga, trane, tusta, vatto, virle, virra, zippe, zoffa.

## Supplementary Figure legends

**Supplementary Figures 1-5.** RTs for zigzag novel words (NW) as a function of the number of sessions. Filled symbols and dark bars report data for the dyslexic children; open symbols and white bars report data for the controls. RT data were fit by individual power functions, separately for each child. Equations describing the learning curves for dyslexic children were: MS  $y = 92x^{-1.42} + 570$ ; DB  $y = 257x^{-.35} + 480$ ; AD  $y = 135x^{-2.60} + 720$ ; VG  $y = 451x^{-.36} + 470$ ; MA  $y = 379x^{-2.05} + 800$ . Equations describing the learning curves for controls were: AR  $y = 215x^{-.84} + 490$ ; MA  $y = 142x^{-.43} + 560$ ; GI  $y = 244x^{-.35} + 500$ ; IA  $y = 728x^{-.85} + 440$ ; LI  $y = 767x^{-.32} + 400$ .

**Supplementary Figures 6-10.** Accuracy data (percentage of errors) for zigzag novel words (NW) as a function of testing sessions. Filled symbols and dark bars report data for the dyslexic children; open symbols and white bars report data for the controls. Accuracy data were fit by individual power functions. Equations describing the curves for dyslexic children were: MS  $y = 20.2x^{-.34} + 0$ ; DB  $y = 12.3x^{-.60} + 0$ ; AD  $y = 15.2x^{-0.40} + 0$ ; VG  $y = 20.2x^{-0.34} + 0$ ; MA  $y = 38.1x^{-.40} + 0$ . Equations describing the learning curves for controls were: AR  $y = 21.8x^{-0.70} + 0$ ; MA  $y = 22.4x^{-0.80} + 0$ ; GI  $y = 16.1x^{-0.60} + 0$ ; IA  $y = 5.71x^{-0.20} + 0$ ; LI  $y = 21.7x^{-0.40} + 0$ . Even with clear individual differences, all children reduced their error rate during training excluding a trade-off interpretation of RT reduction with training.

Supplementary Fig. 1

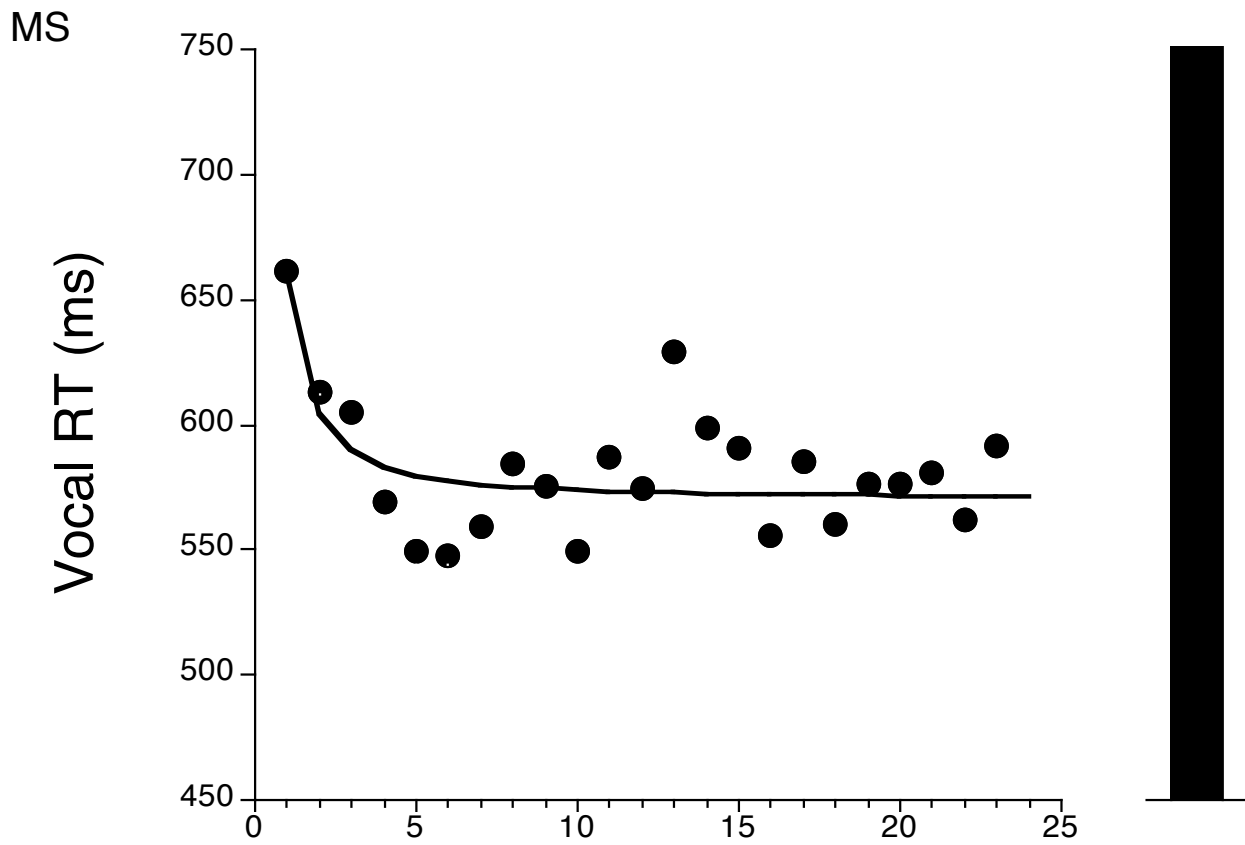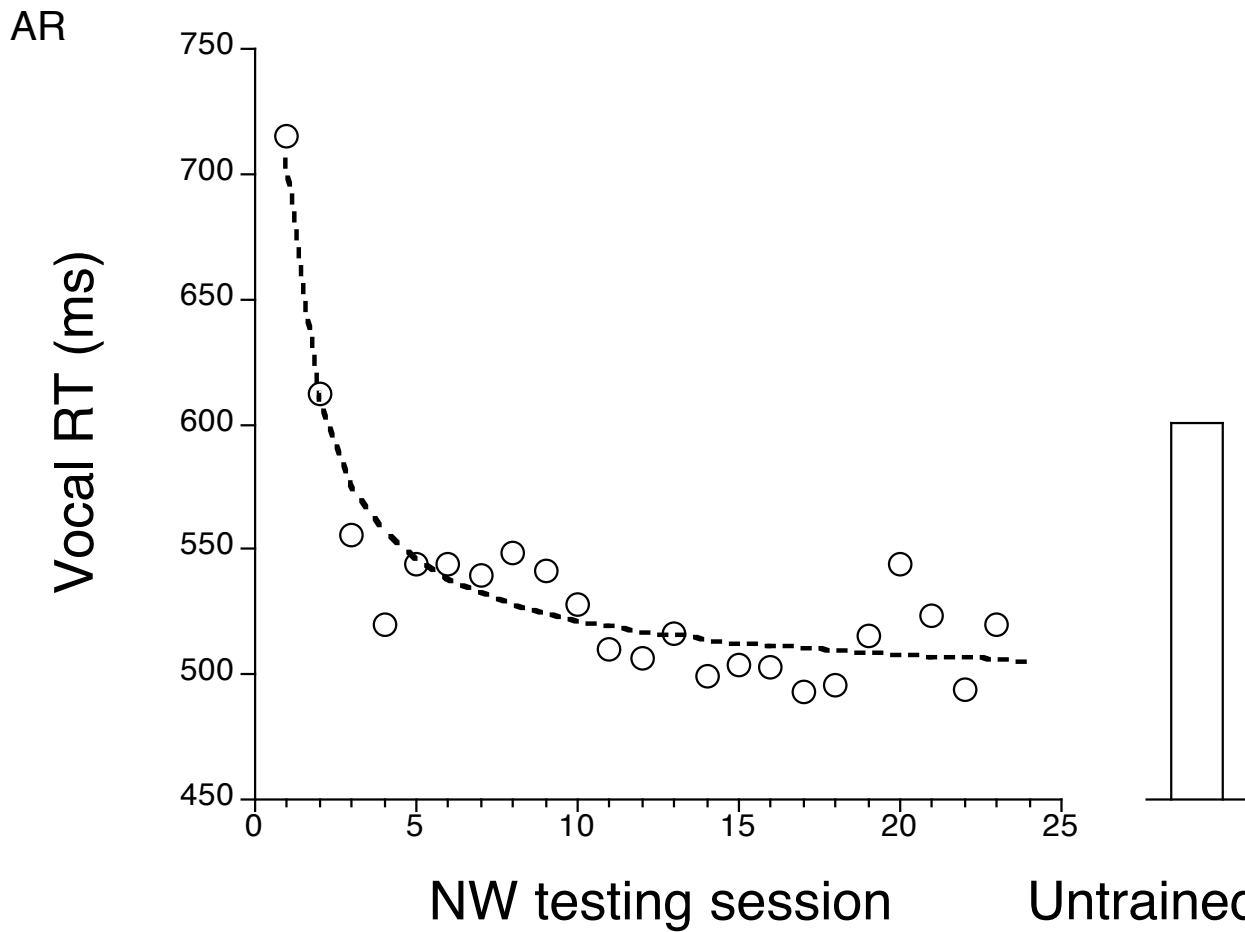

Supplementary Fig. 2

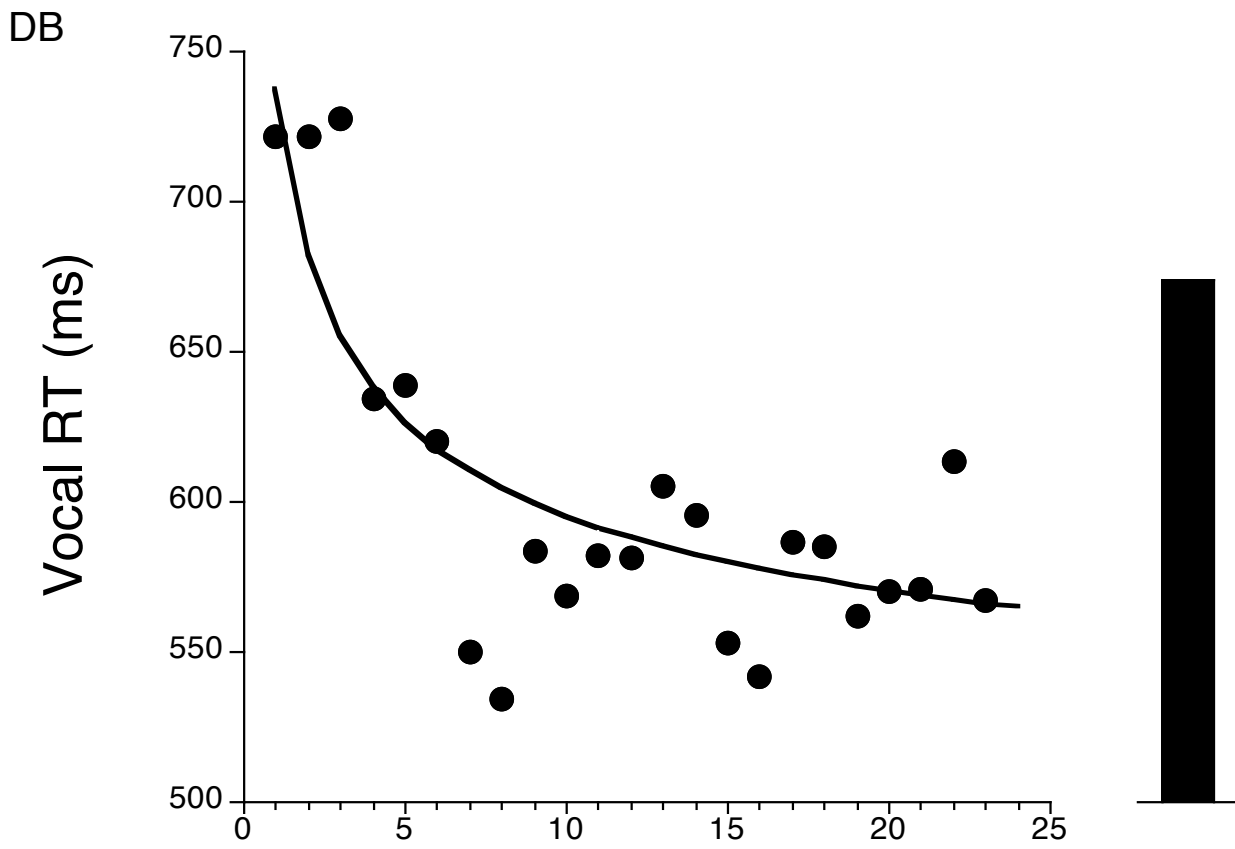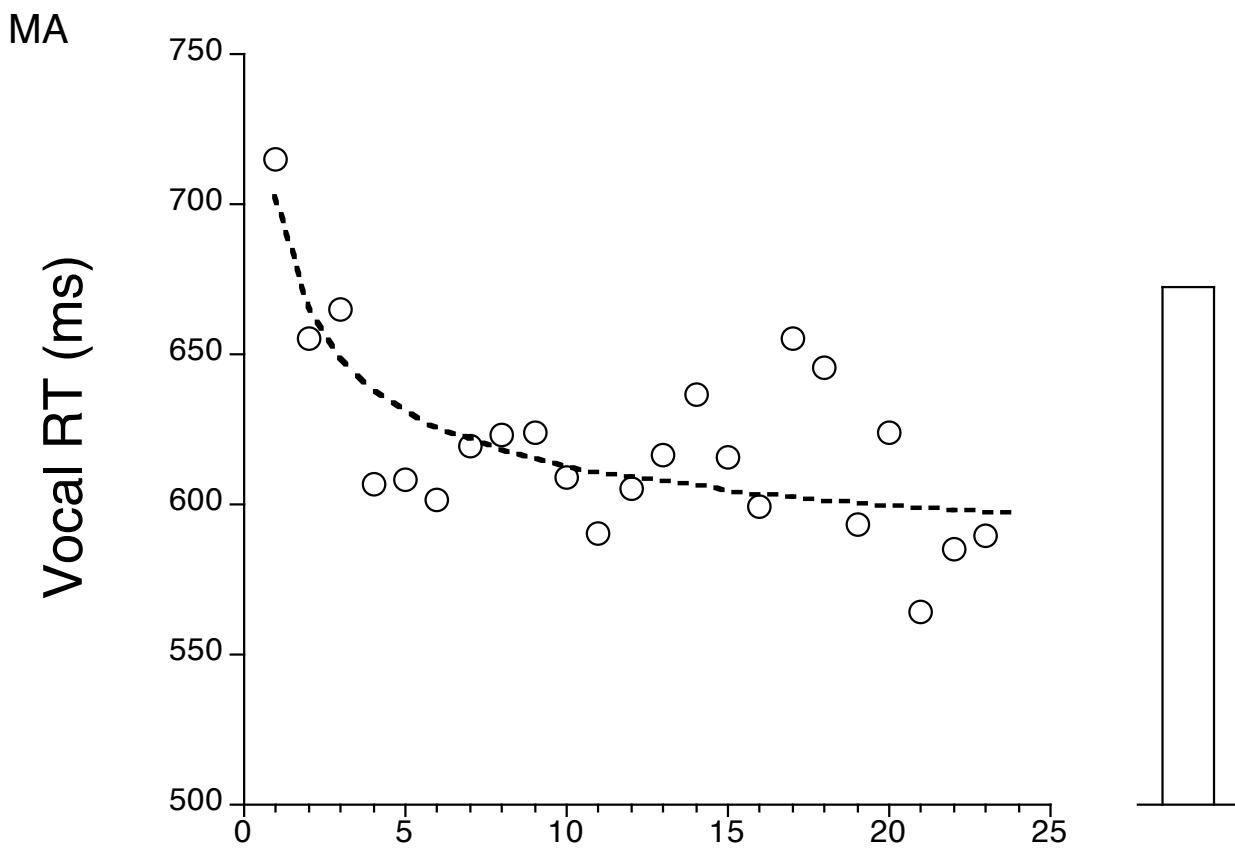

NW testing session

Untrained NW

Supplementary Fig. 3

AD

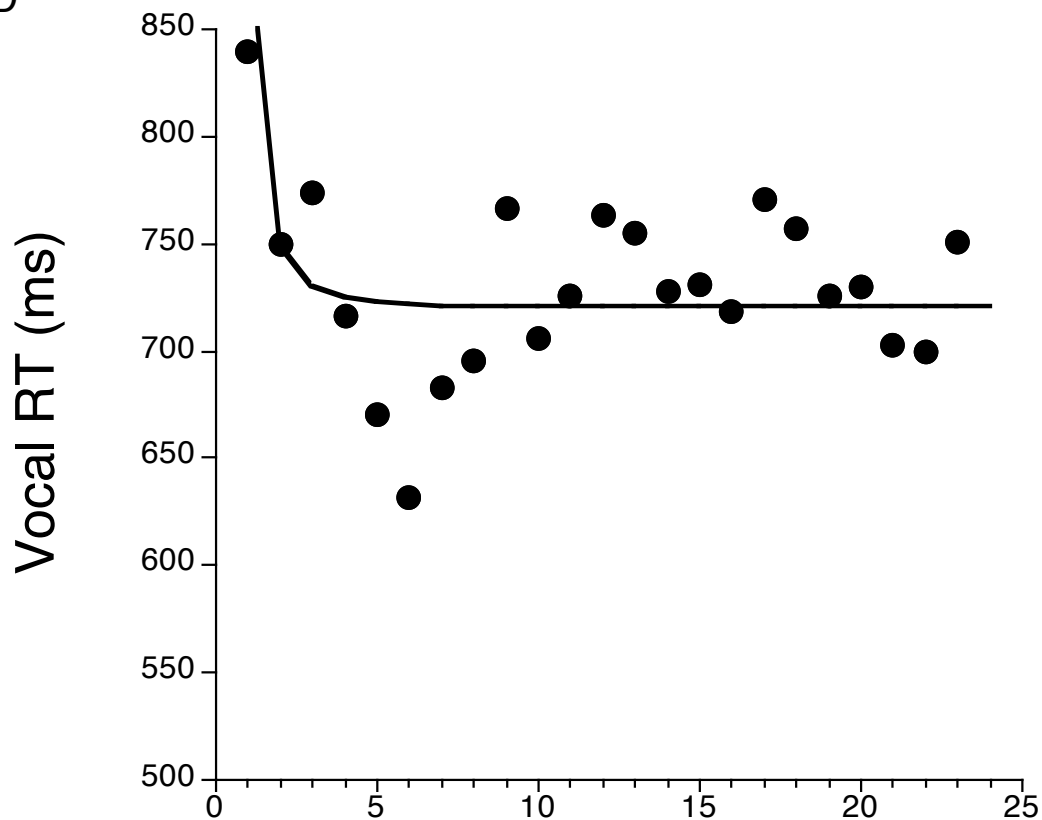

GI

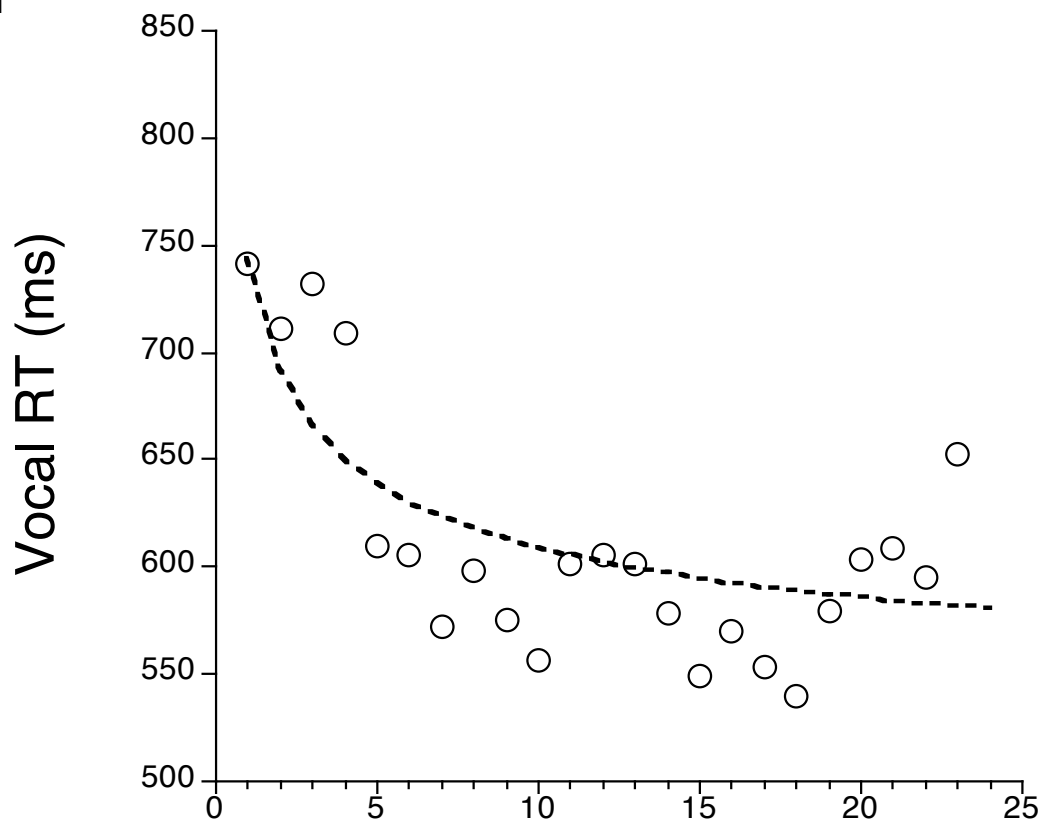

NW testing session

Untrained NW

Supplementary Fig. 4

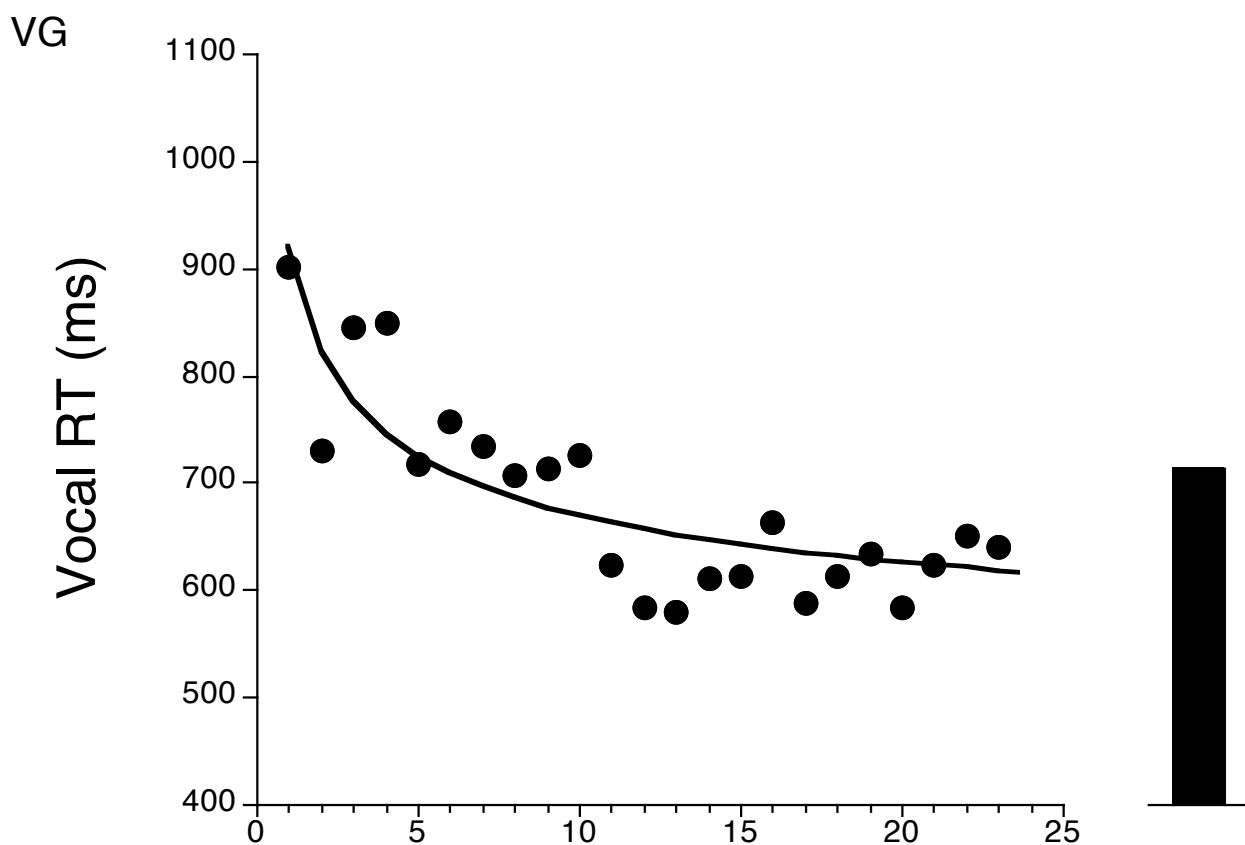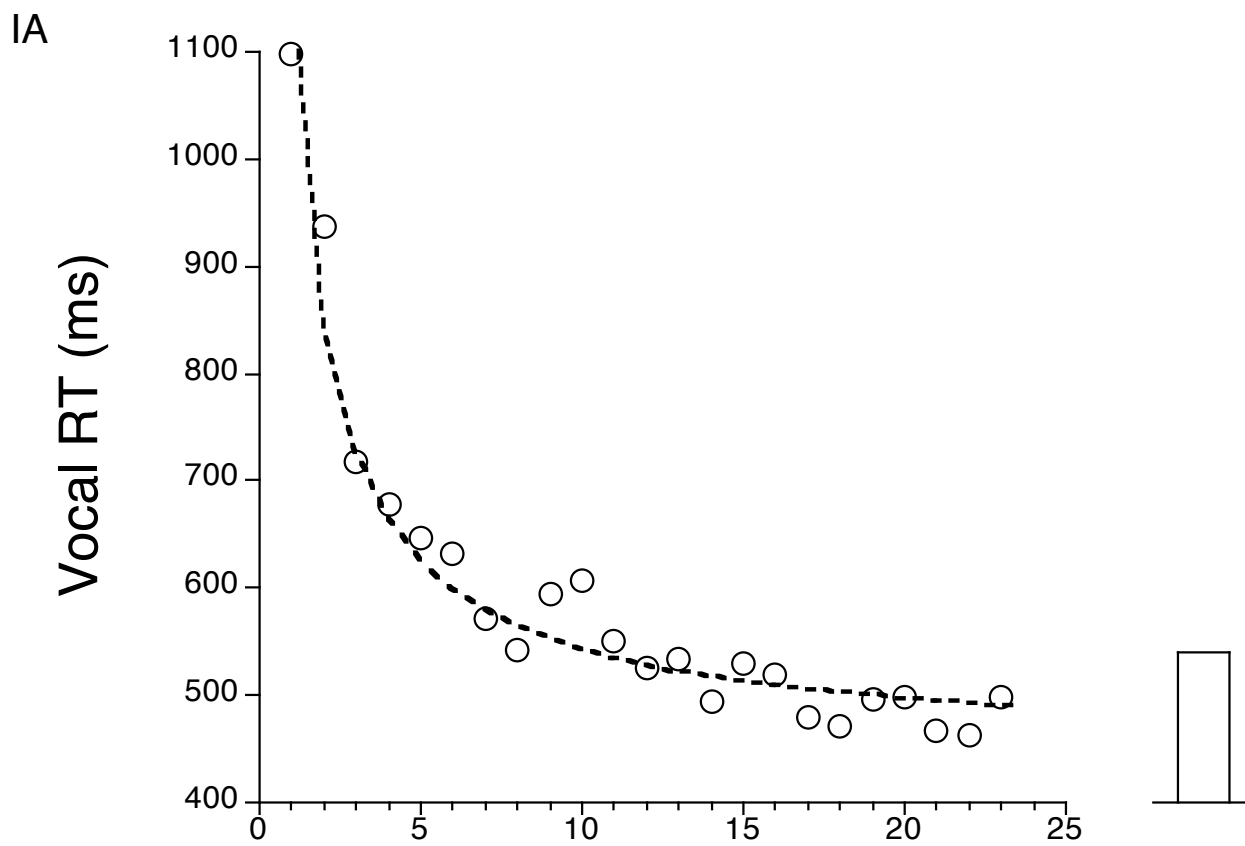

NW testing session

Untrained NW

Supplementary Fig. 5

MA

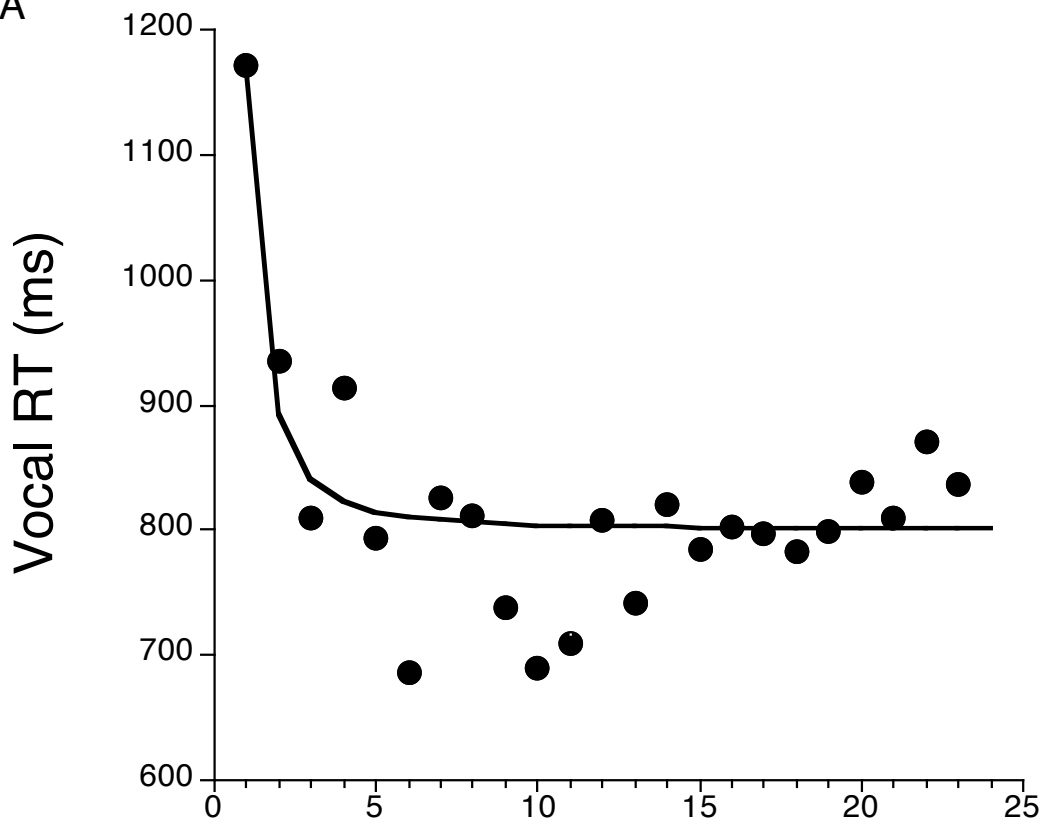

LI

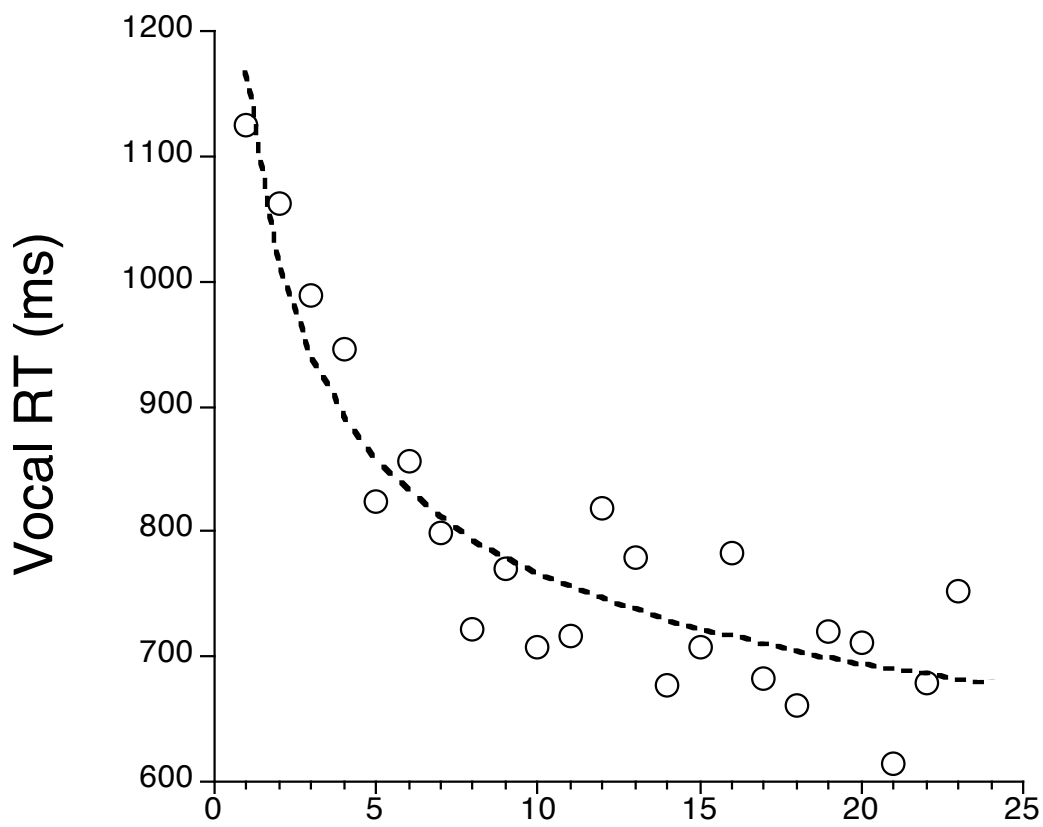

NW testing session

Untrained NW



Supplementary Figure 6

MS

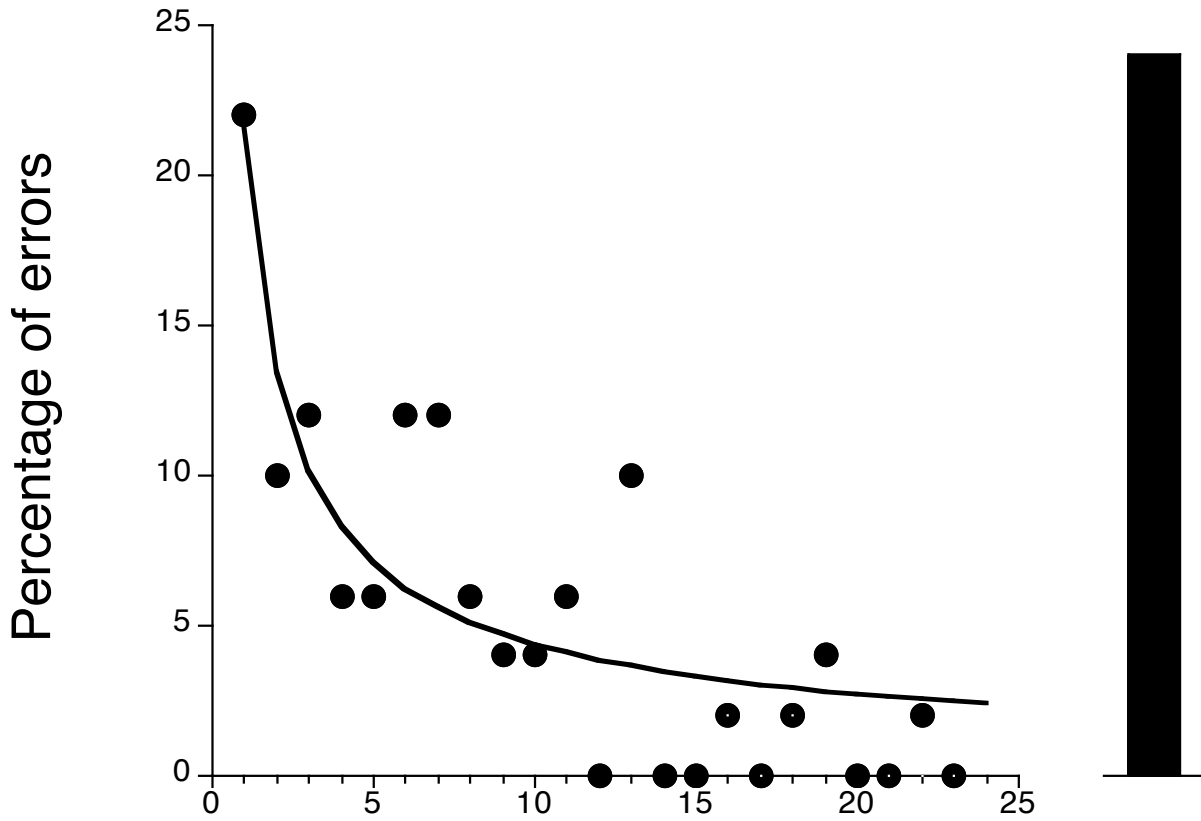

AR

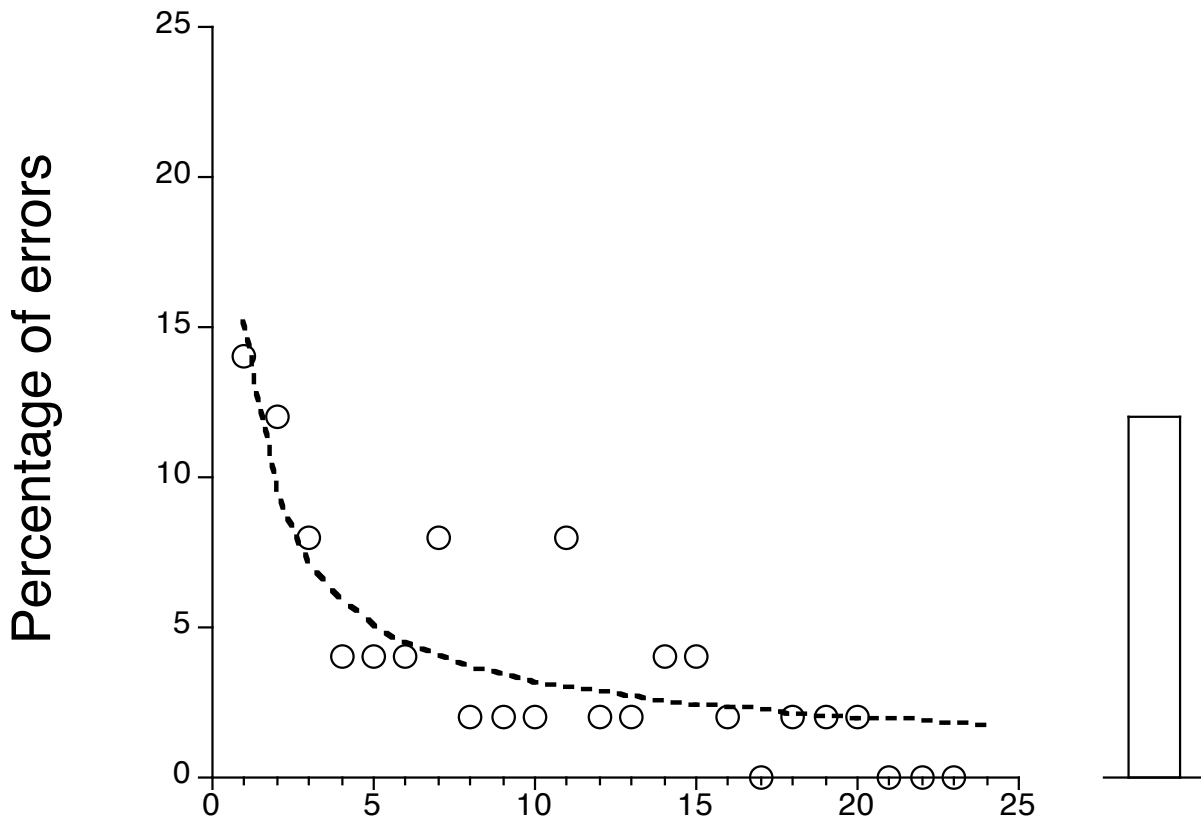

NW testing session

Untrained NW

Supplementary Figure 7

DB

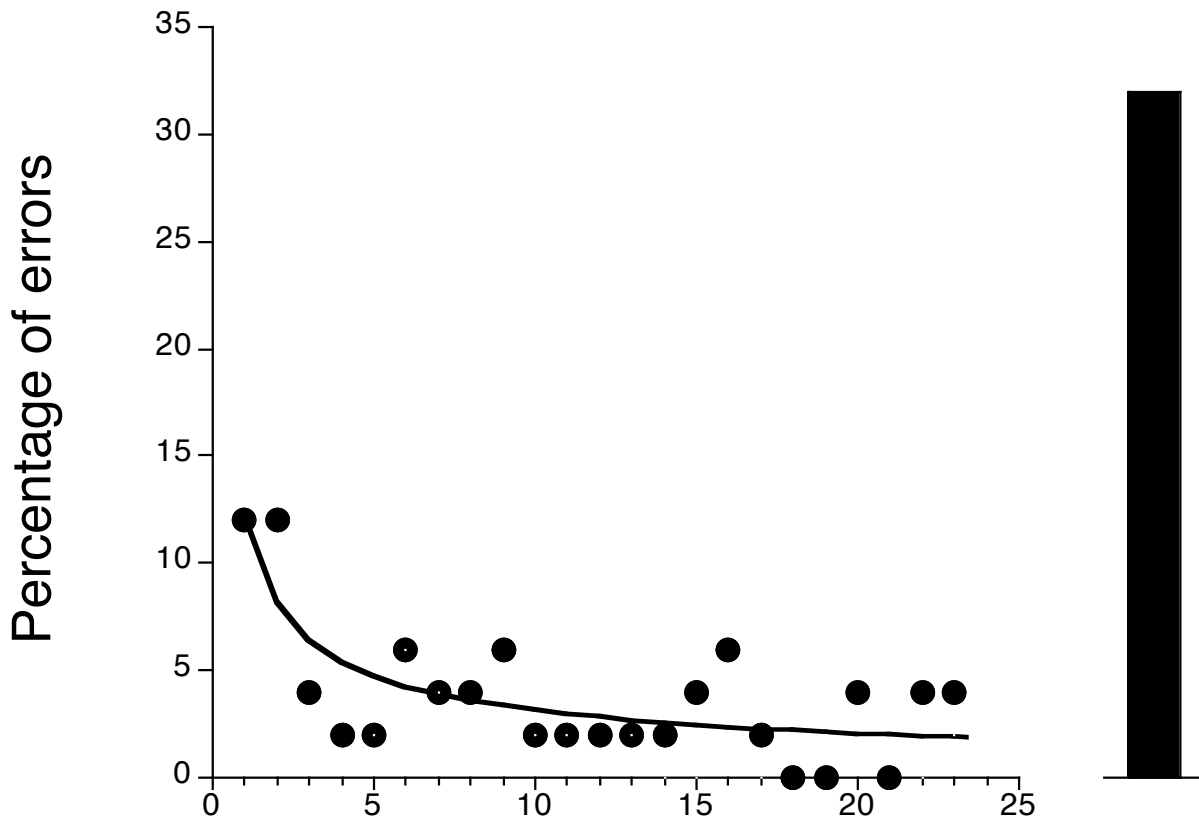

MA

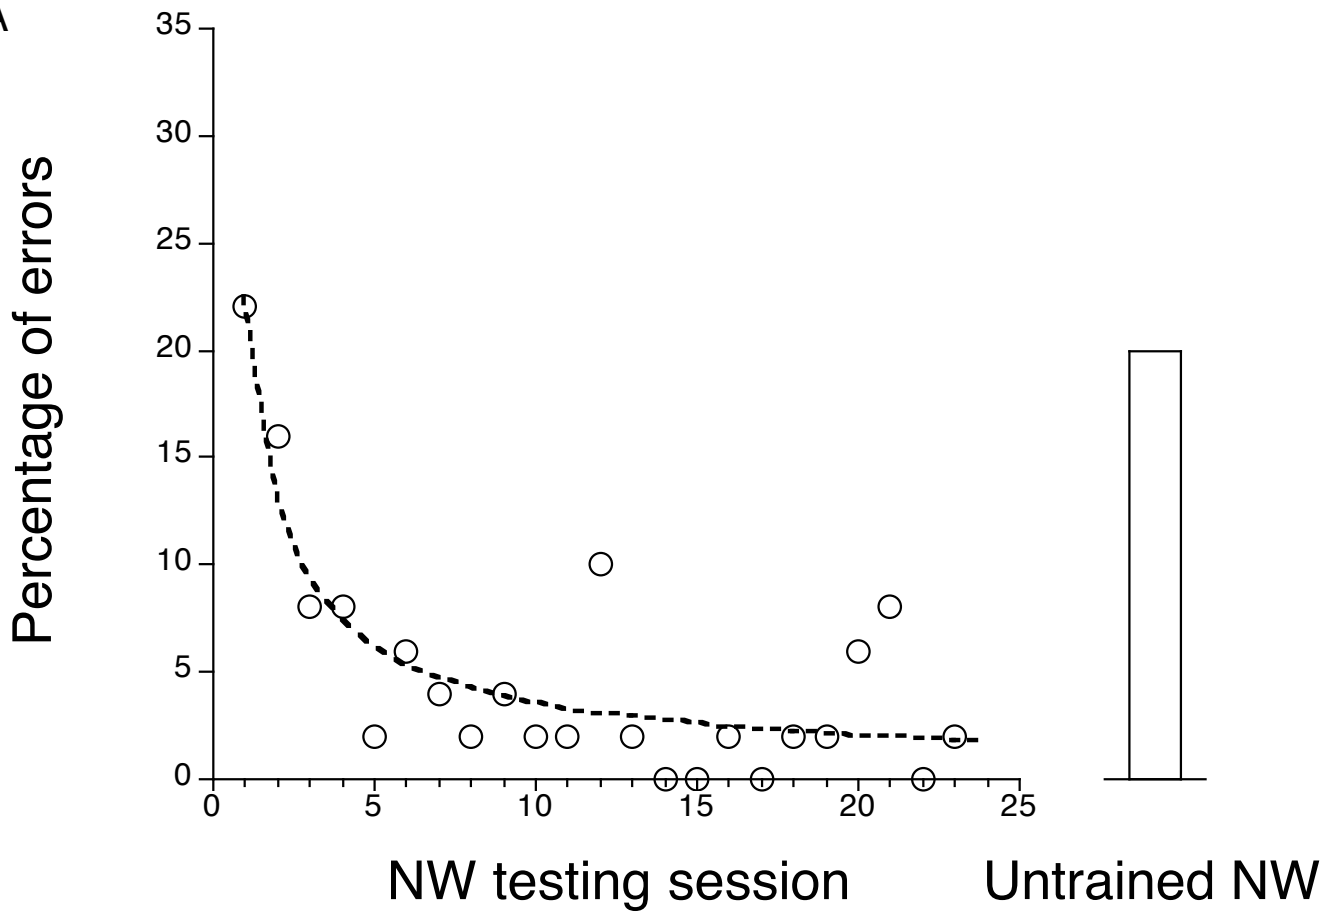

Supplementary Figure 8

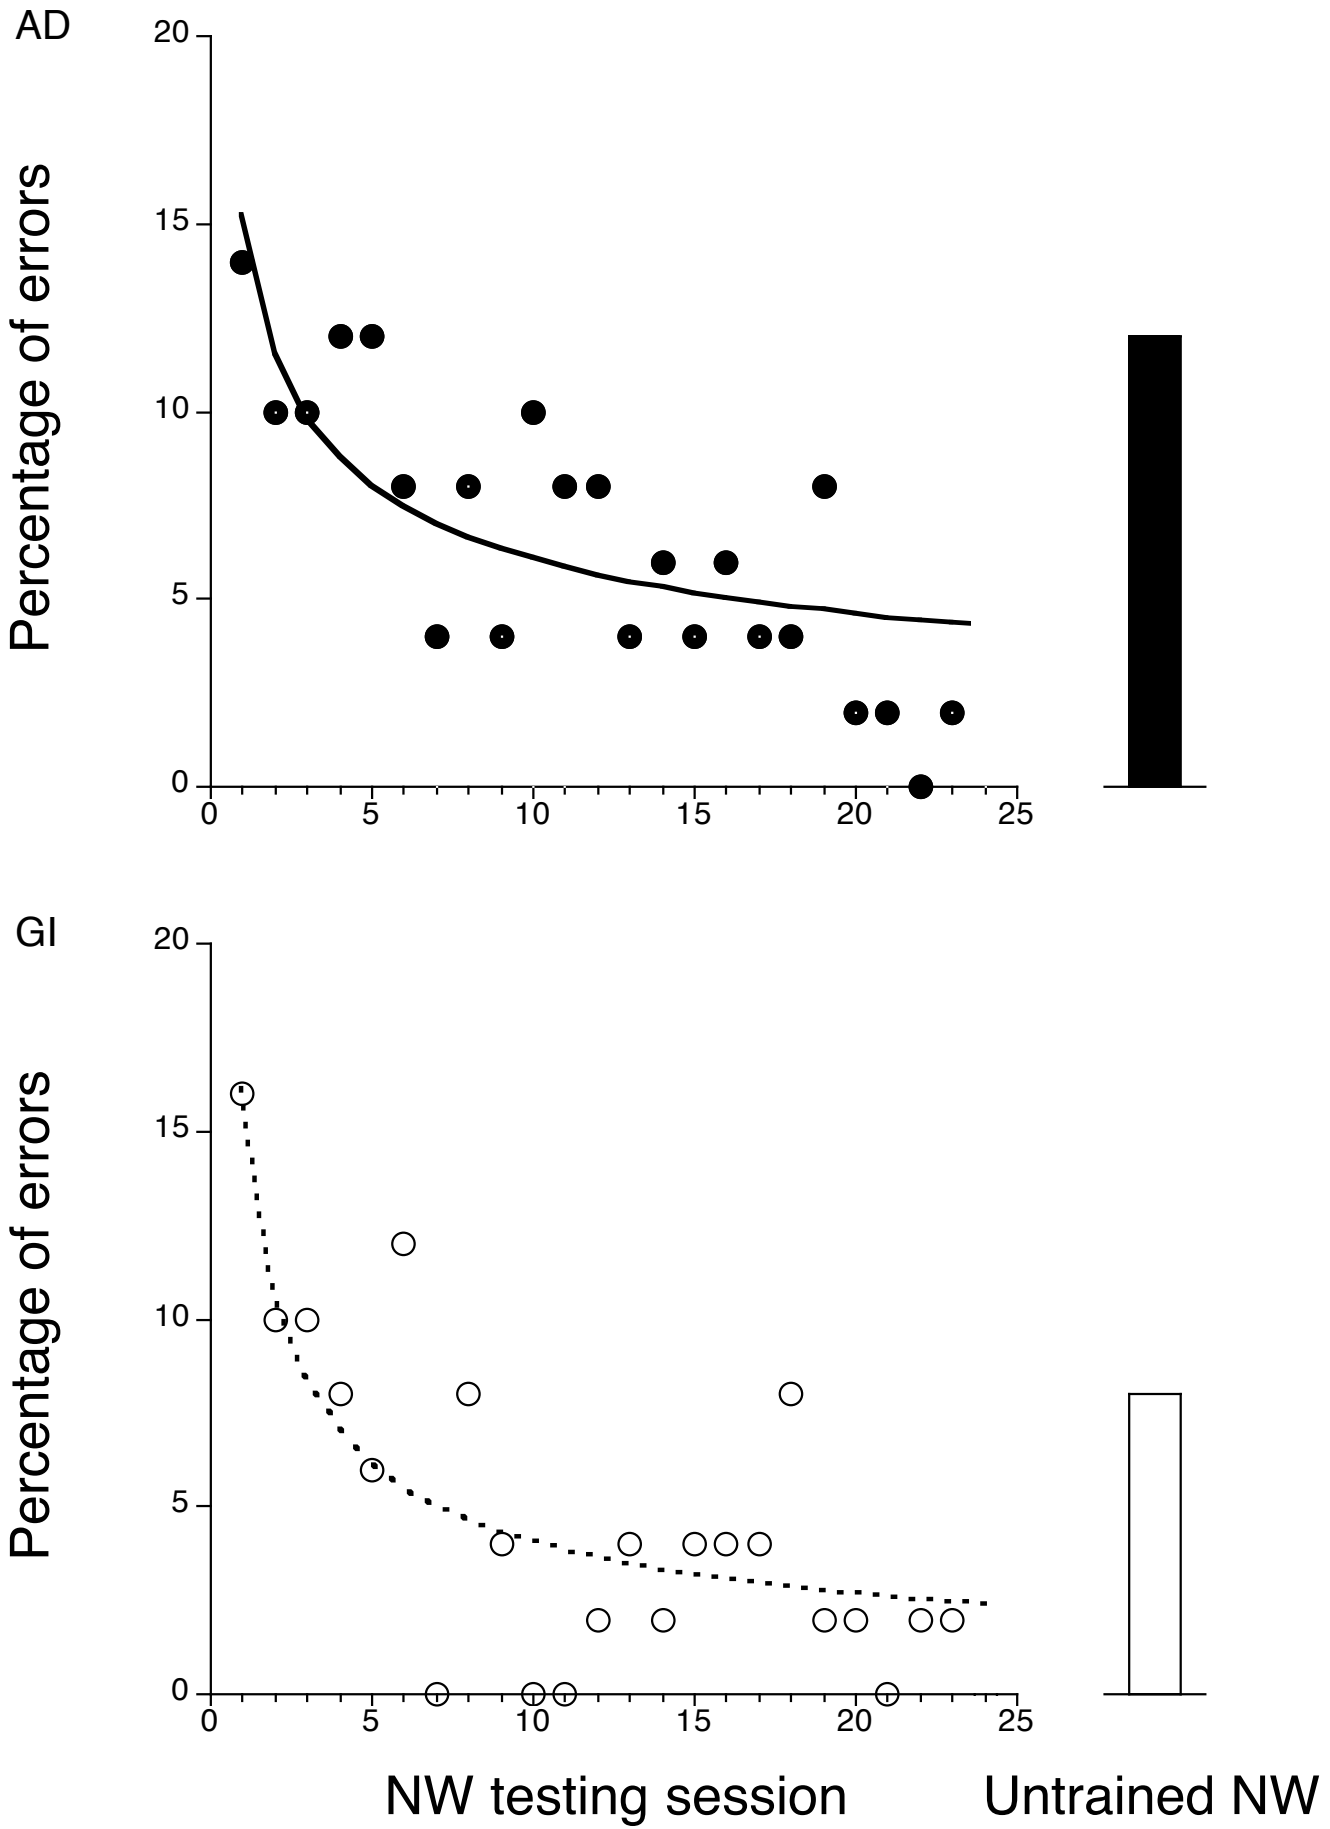

Supplementary Figure 9

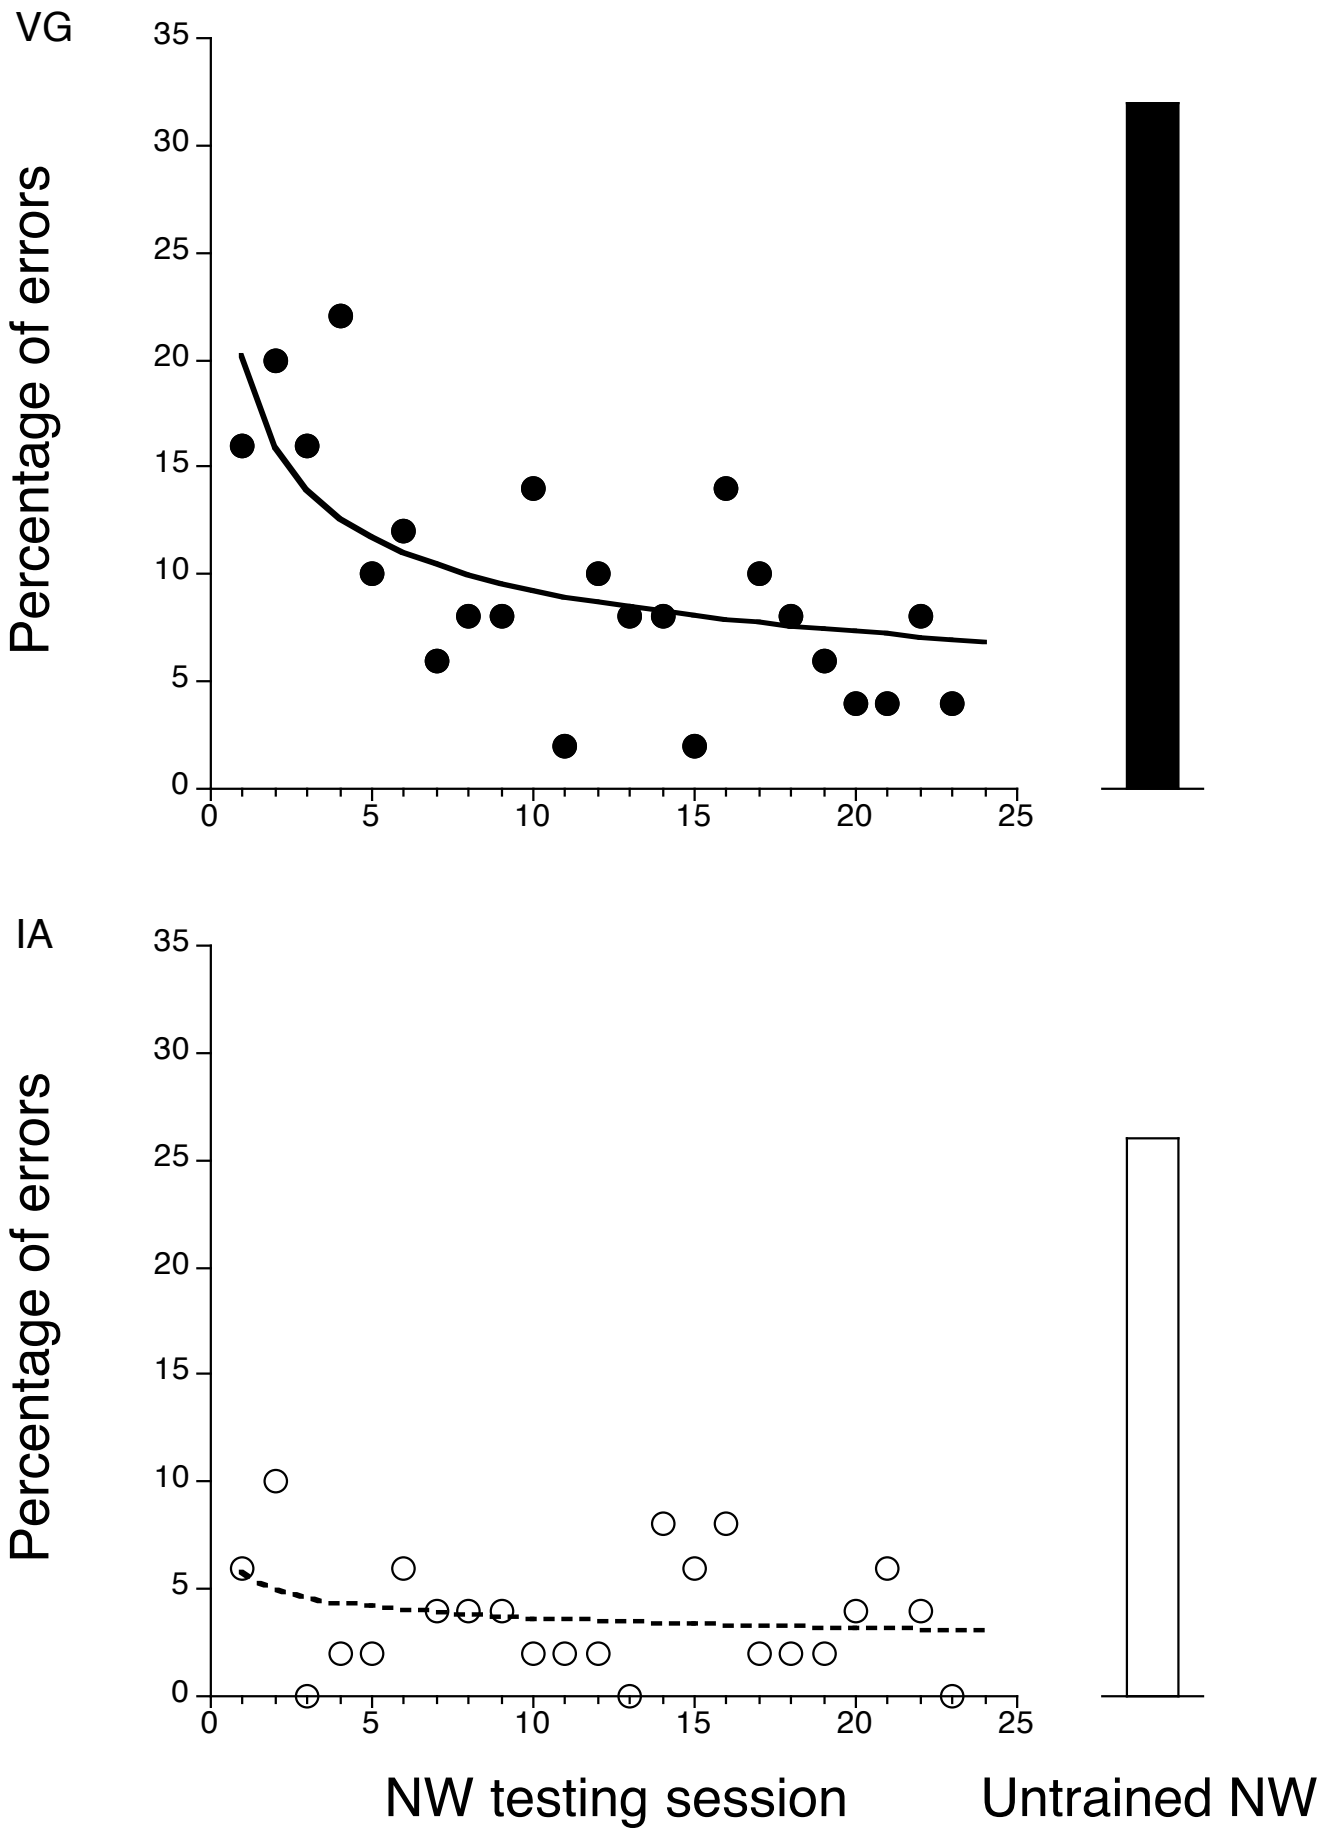

Supplementary Figure 10

MA

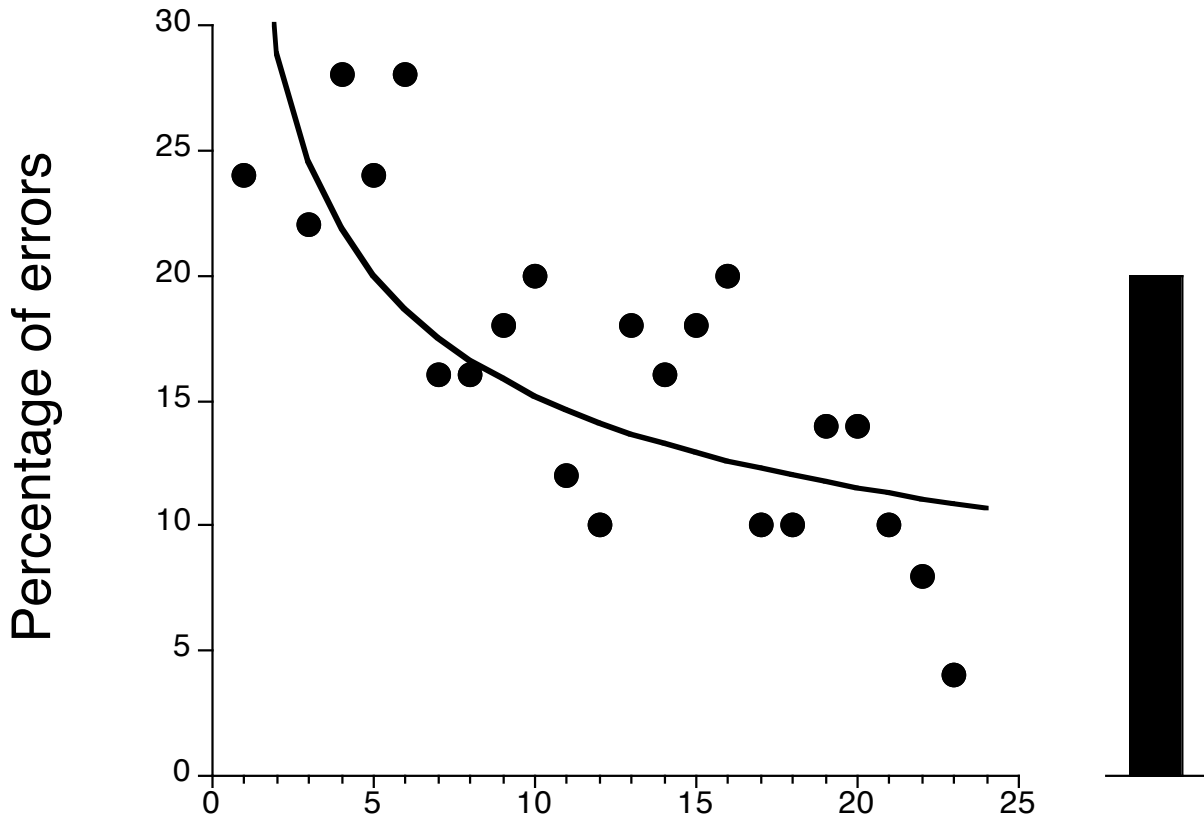

LI

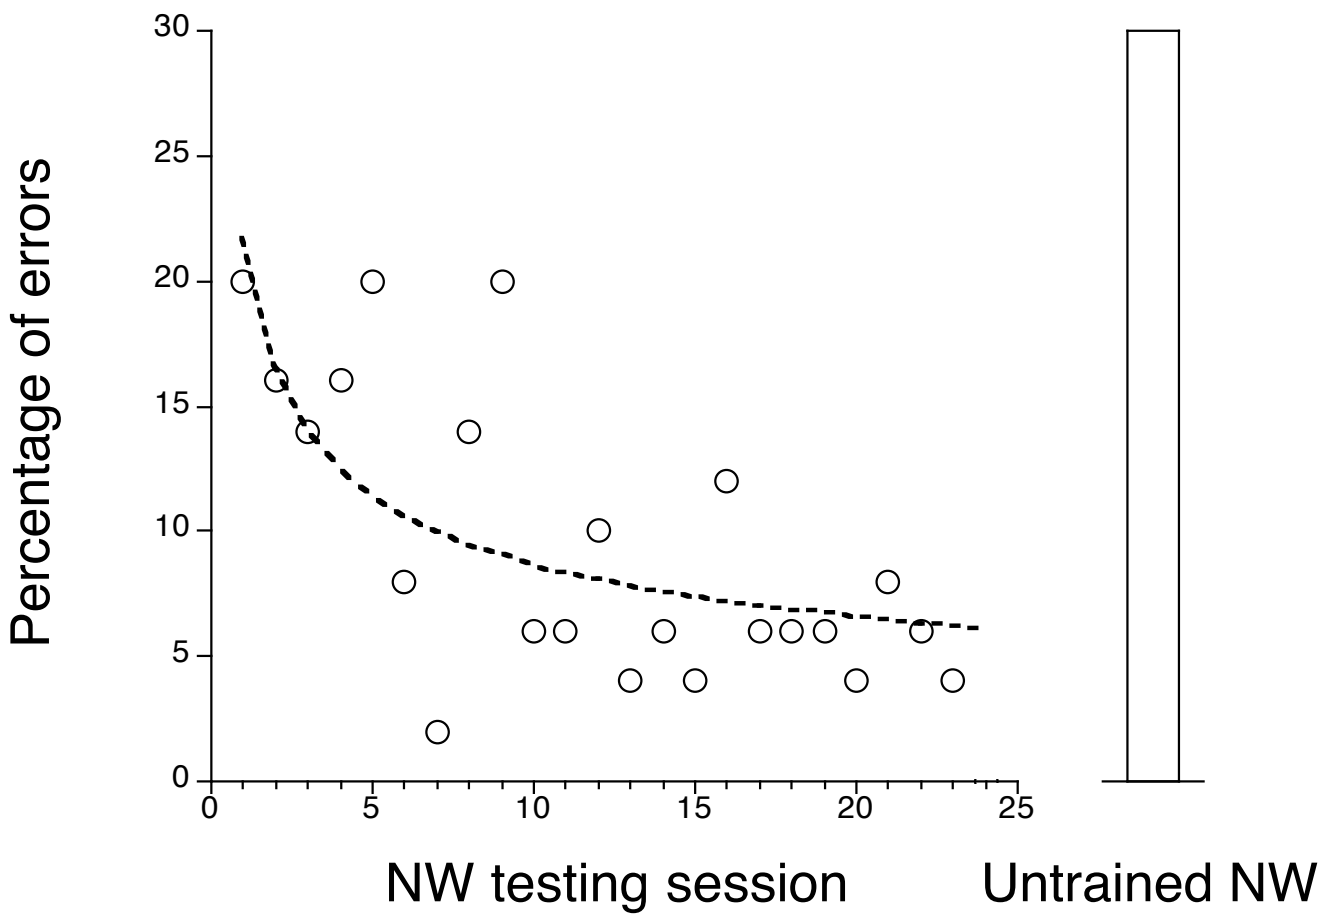

Supplement: srep04869-s1.pdf [file srep04869-s1.pdf]
